# Supplementary material for: Matrix stiffness regulates Notch signaling activity in endothelial cells
Source: Oxford University Press journal article supplement (doi:10.1242/jcs.260442), 2023-01-15
Supplement: jcs260442supp.pdf [file jcs260442supp.pdf]

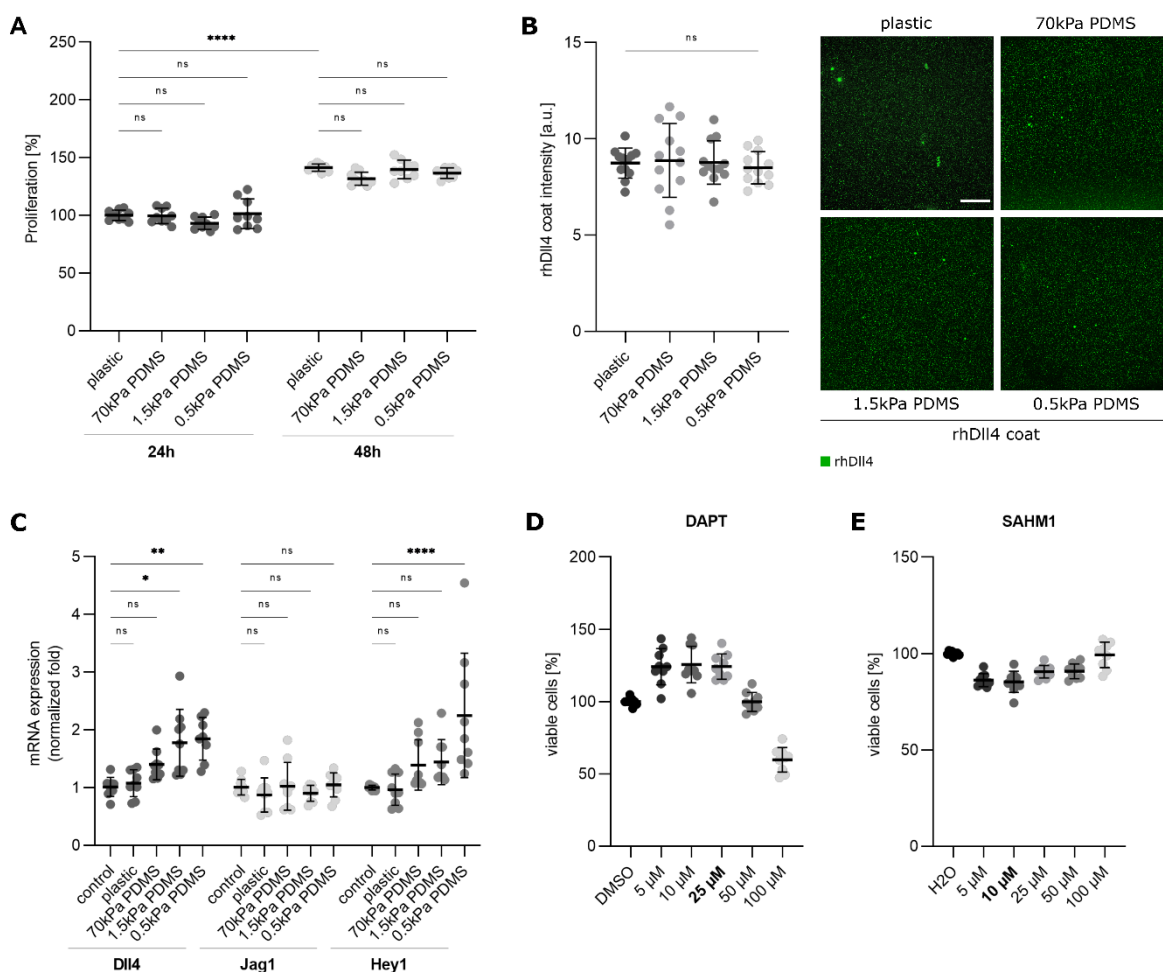

**Fig. S1. General proliferation and protein coating on the PDMS substrates are not stiffness dependent and the applied inhibitor concentrations do not have a cytotoxic effect on the cells.**

(A) Proliferation of HUVEC cells on substrates with different stiffnesses, incubated for 24h and 48h. Data from three independent experiments, each with triplicates, are shown in scatter plots as mean values  $\pm$  SD (two-way ANOVA followed by Tukey's multiple comparison test, ns  $\triangleq$  not significant, \*\*\*\* $P < 0.0001$ ). (B) PDMS substrates were coated with rhDII4 and stained for DII4 (shown in green). rhDII4 binding efficiency was compared by evaluation of intensity and the number of particles, summarized in a scatter plot on the left panel (three independent experiments, mean  $\pm$  SD, one-way ANOVA followed by Tukey's multiple comparison test, ns  $\triangleq$  not significant). (C) Normalized fold mRNA expression of the Notch ligands DII4, Jag1 and the Notch target gene Hey1 in HUVECs, outlined in a scatter plot (three independent experiments, each with triplicates, mean  $\pm$  SD, one-way ANOVA followed by Tukey's multiple comparison test, ns  $\triangleq$  not significant, \* $P < 0.1$ , \*\* $P < 0.01$ , \*\*\*\* $P < 0.0001$ ). Induction of Notch activity by coating with rhDII4. Data was normalized to cells on plastic without Notch activation. (D, E) CellTiter-Blue viability assay in HUVEC cells. Cells were treated with the Notch inhibitors DAPT (D) or SAHM1 (E) at different concentrations for 24h. Cell viability is shown in a scatter plot as mean values  $\pm$  SD (three independent experiments, each with triplicates). The concentrations used for Notch inhibition are indicated in bold.

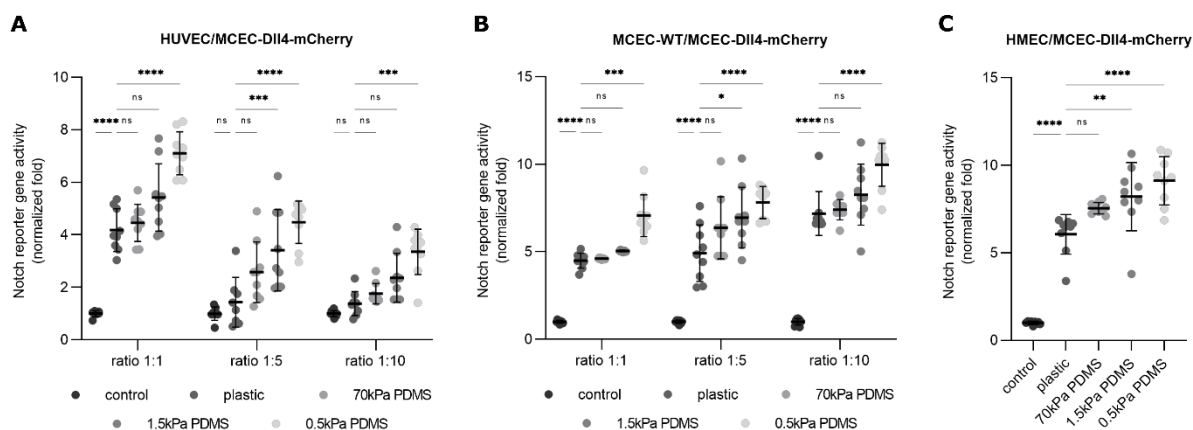

**Fig. S2. Notch activation by co-culture of Notch sender and receiver cells increases in soft substrates in all Notch receiver cells but is dependent on the seeding ratio.**

(A, B) Normalized fold Notch activity in endothelial co-cultures of HUVEC/MCEC-DII4-mCherry cells (A) and MCEC-WT/MCEC-DII4-mCherry cells (B) in seeding ratios of 1:1, 1:5 and 1:10. Scatter plots were generated by evaluation of reporter gene assays on substrates with different stiffnesses (three independent experiments, each with triplicates, two-way ANOVA followed by Tukey's multiple comparison test, ns  $\triangleq$  not significant, \* $P < 0.1$ , \*\*\*\* $P < 0.0001$ ). Data was normalized to cells on plastic without Notch activation (in co-culture with untransfected HUVEC/MCEC-WT cells). (C) Normalized fold Notch activity in HMEC/MCEC-DII4-mCherry co-culture ratio 1:1, outlined in a scatter plot (three independent experiments, each with triplicates, mean  $\pm$  SD, one-way ANOVA followed by Tukey's multiple comparison test, ns  $\triangleq$  not significant, \*\* $P < 0.01$ , \*\*\*\* $P < 0.0001$ ). Data was normalized to cells on plastic without Notch activation (in co-culture with untransfected HMEC cells).

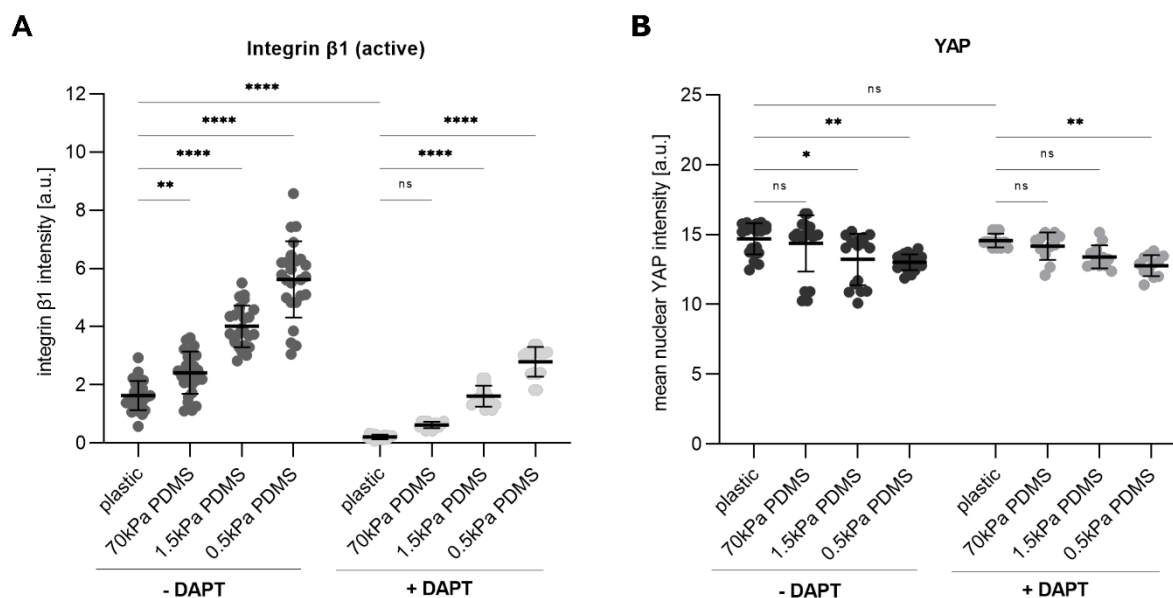

**Fig. S3. Integrin  $\beta 1$  intensity in MCEC-WT cells is dependent on substrate stiffness as well as the Notch signaling pathway, whereas the nuclear intensity of YAP does not change after Notch inhibition by DAPT.**

(A, B) MCEC-WT cells were seeded on varying substrate stiffness, treated with 25 $\mu$ M DAPT for 24h and stained for either the activated form of integrin  $\beta 1$  or YAP. The mean overall intensity for integrin  $\beta 1$  and the nuclear intensities for YAP  $\pm$  SD of  $\leq$  240 untreated and treated cells derived from three independent experiments are summarized in scatter graphs (two-way ANOVA followed by Tukey's multiple comparison test, ns  $\triangleq$  not significant, \*\* $P < 0.01$ , \*\*\*\* $P < 0.0001$ ). Integrin intensities were analyzed in segmented images. YAP intensities were analyzed with the Intensity Ratio Nuclei Cytoplasm Tool plugin for ImageJ.

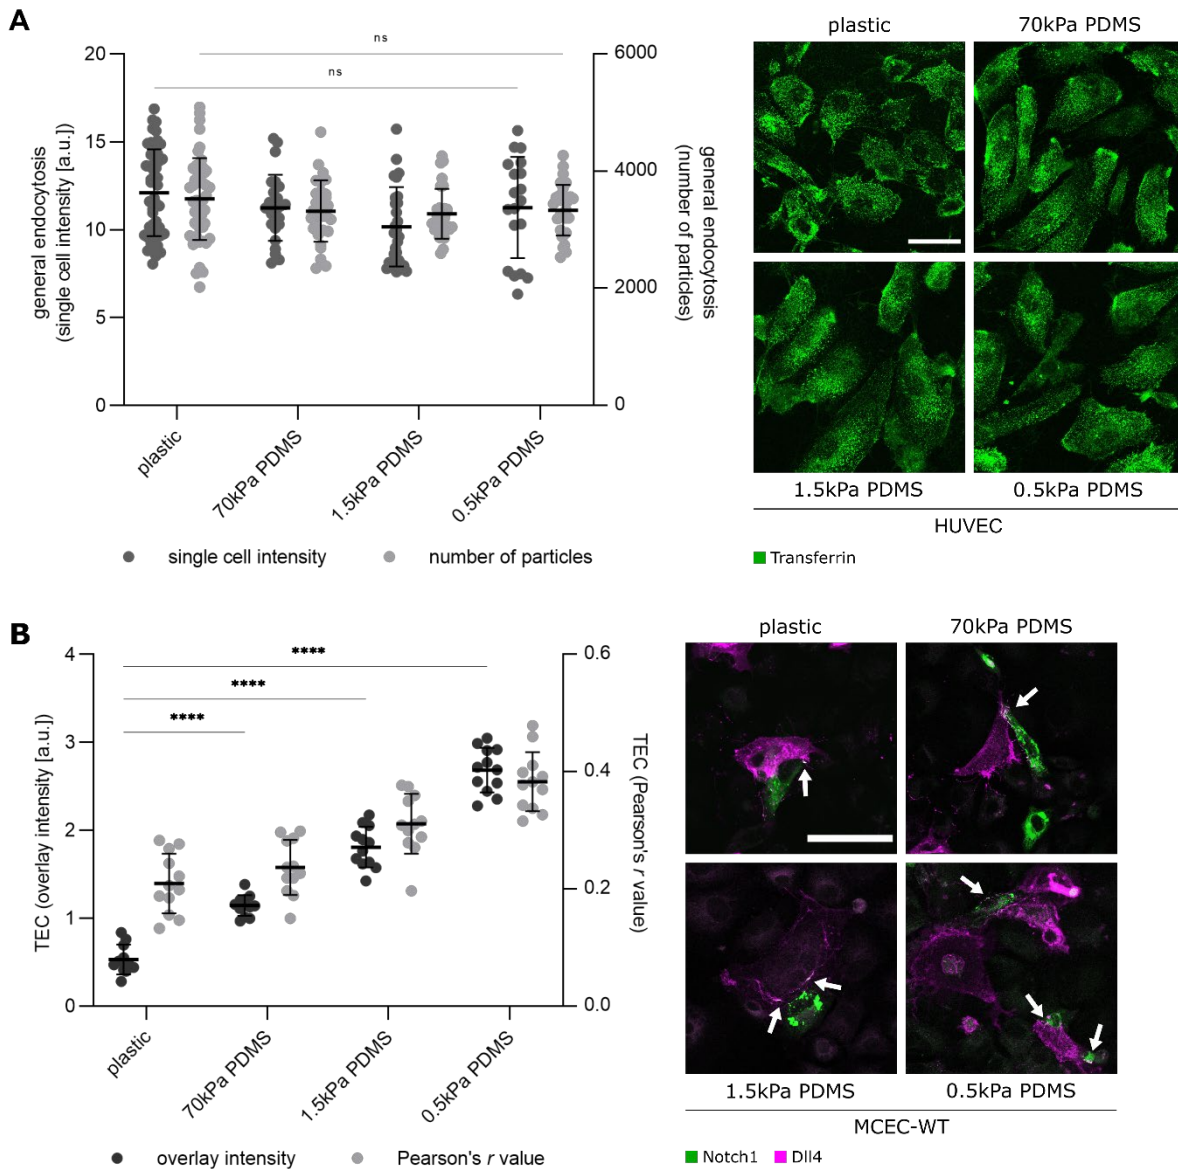

**Fig. S4. General endocytosis is not affected by stiffness and trans-endocytosis in MCEC-WT cells is also increased on softer substrates.**

(A) General endocytosis in HUVEC. Cells were seeded on substrates with different stiffness and a transferrin endocytosis assay was conducted. Intensity and number of particles in individual cells are presented in a scatter plot as means  $\pm$  SD of  $\geq 240$  cells per substrate condition, derived from three independent experiments (two-way ANOVA followed by Tukey's multiple comparison test, ns  $\triangleq$  not significant) Both intensity and particle number were determined in segmented images and ROIs of the cells. (B) Overlay intensity and Pearson's r value in areas of Notch receptor ligand interactions in the course of trans-endocytosis. Overlay areas are indicated by the white arrows. MCEC-WT cells were transfected separately with a citrine-coupled Notch1 plasmid and a mCherry-coupled Dll4 plasmid. Notch1 expressing Notch receiver cells are shown in green, Dll4 expressing Notch sender cells are shown in magenta. Trans-endocytosis was quantified at cell-cell contacts in  $\geq 12$  cells per substrate condition in three independent experiments. Data is presented as a scatter plot (mean value  $\pm$  SD, two-way ANOVA with Tukey's multiple comparison test, \*\*\*\* $P < 0.0001$ ).
